# Supplementary material for: Hydrological Functioning of Maize Crops in Southwest France Using Eddy Covariance Measurements and a Land Surface Model
Source: MDPI journal article supplement (doi:10.3390/w13111481), 2021-05-25
Supplement: s1 [file s1]

**Table S1.** Performance of the Bowen ratio correction method for the convective fluxes.

| Year | EBC  |      | Residual ( $\text{W m}^{-2}$ ) |      | RMSE ( $\text{W m}^{-2}$ ) |      | MAE ( $\text{W m}^{-2}$ ) |      |
|------|------|------|--------------------------------|------|----------------------------|------|---------------------------|------|
|      | Raw  | Corr | Raw                            | Corr | Raw                        | Corr | Raw                       | Corr |
| 2008 | 0.67 | 0.98 | 69.7                           | 4.2  | 48.9                       | 14.2 | 43.8                      | 6.5  |
| 2010 | 0.61 | 0.99 | 61.8                           | 4.3  | 72.4                       | 13.6 | 66.1                      | 6.7  |
| 2012 | 0.66 | 0.96 | 57.3                           | 7.8  | 58.1                       | 24.9 | 60.6                      | 11.4 |
| 2014 | 0.60 | 0.94 | 28.2                           | 7.0  | 63.9                       | 35.3 | 66.5                      | 14.3 |
| 2015 | 0.78 | 0.95 | 21.6                           | 9.5  | 60.5                       | 22.7 | 58.6                      | 13.2 |

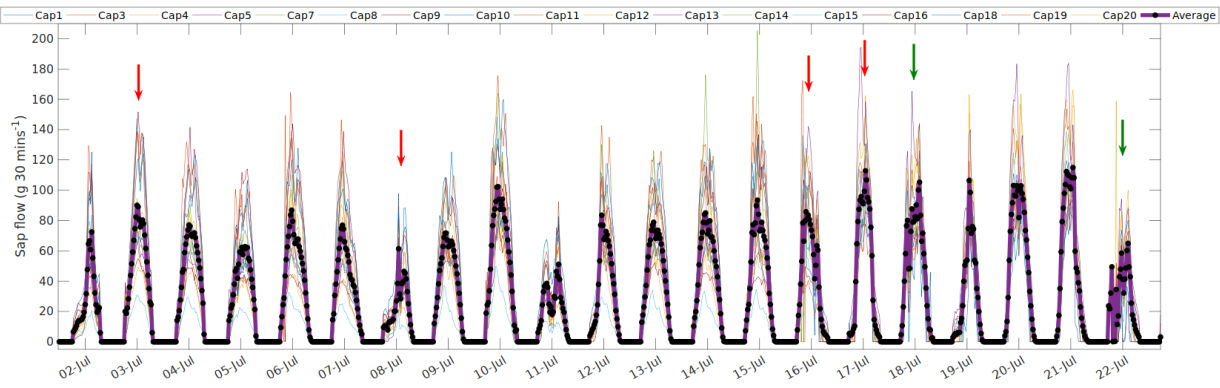

**Figure S1.** Diurnal course of sap flow rate from July 02 to July 22. The solid purple line with black circles is the average measurement of these captors. The red and green arrows signify irrigation and rainfall events respectively.
